# Supplementary material for: Empagliflozin reduces podocyte lipotoxicity in experimental Alport syndrome
Source: eLife journal article supplement (doi:10.7554/elife.83353), 2023-05-02

Figure 1B

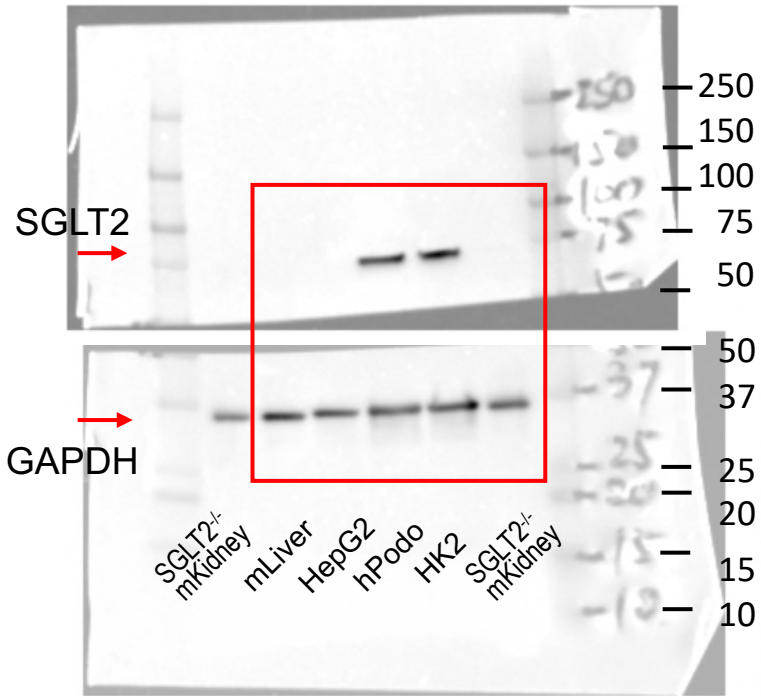

Figure 1C

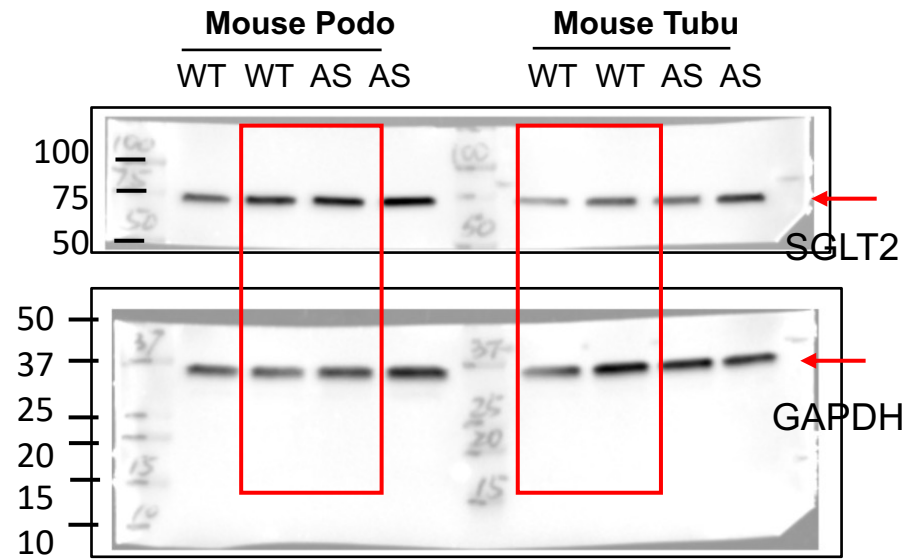

Figure 1-Figure supplement 1

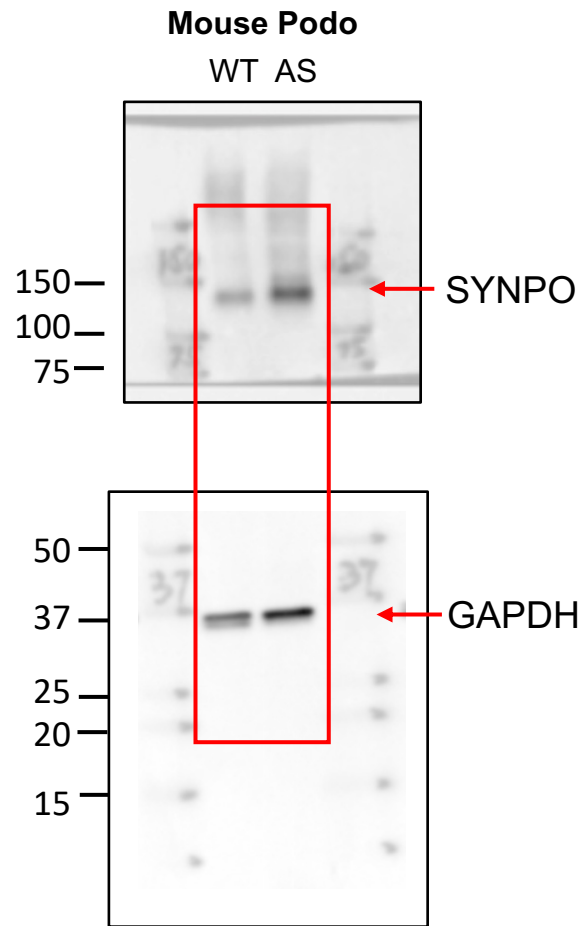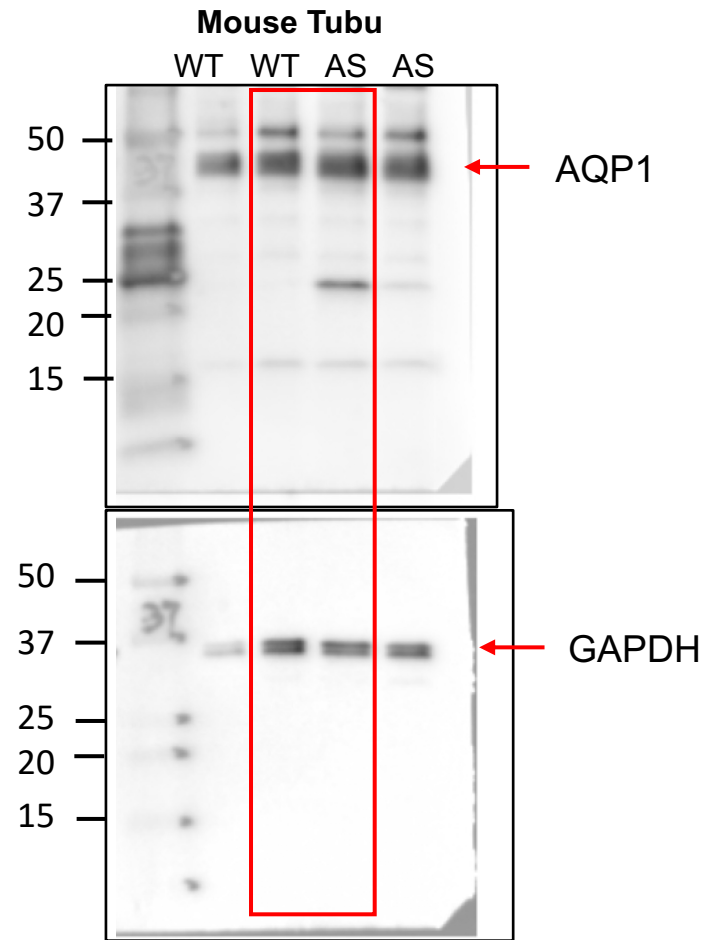

Figure 4A

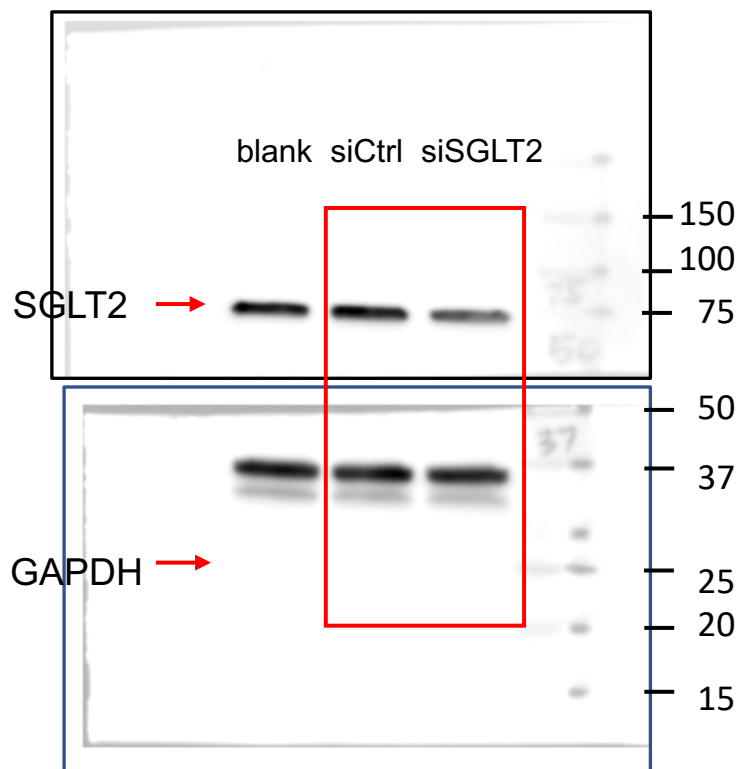

Figure 4E

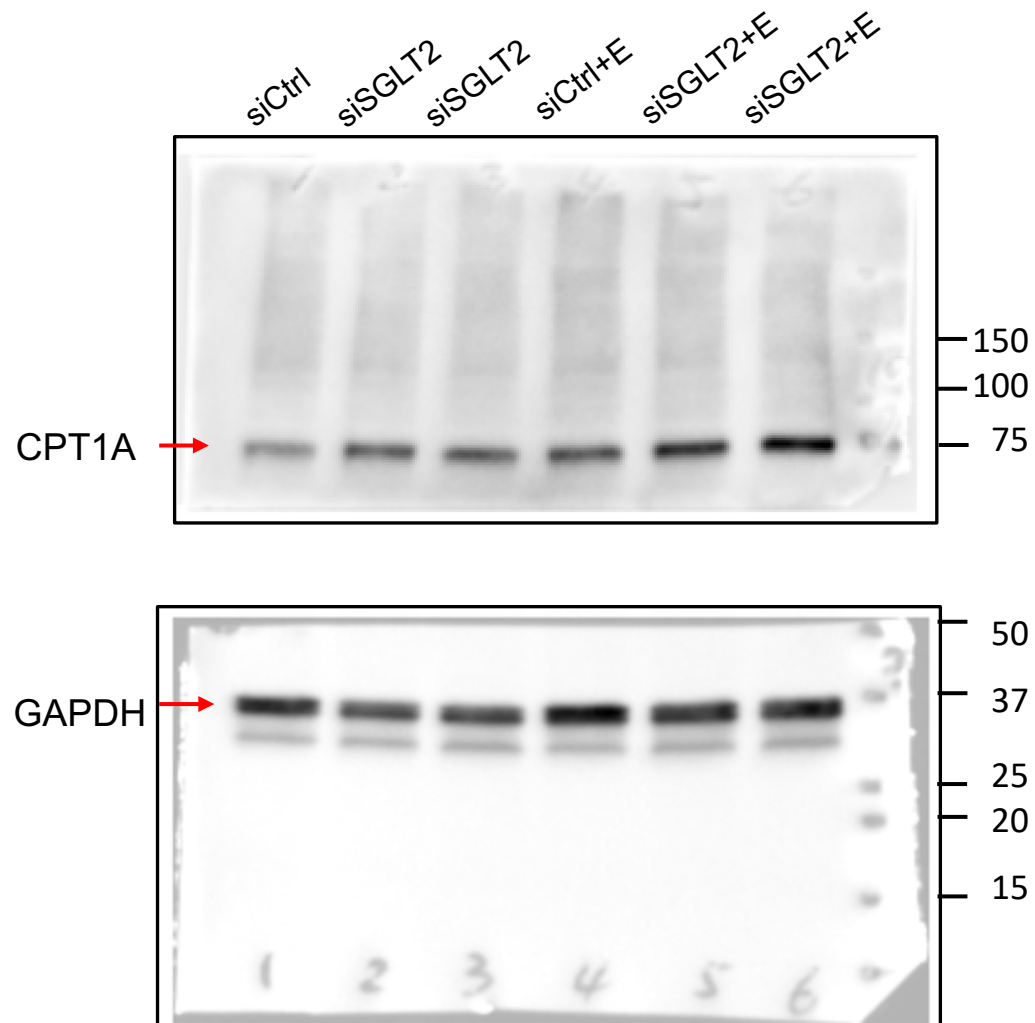

Supplement: supp [file elife-83353-supp-v1.zip]
